# Supplementary material for: Binding interface change and cryptic variation in the evolution of protein-protein interactions
Source: PubMed Central journal article supplement (PMC4758157; doi:10.1186/s12862-016-0608-1), 2016-02-18

Supplementary Figure 1

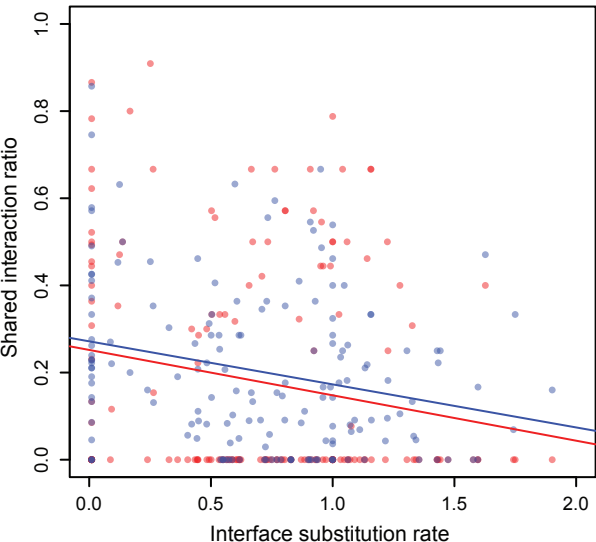

Supplement: 12862_2016_608_MOESM2_ESM.pdf [file 12862_2016_608_MOESM2_ESM.pdf]
